# Supplementary material for: Layer-structured P3-K0.5Mn0.95W0.05O2 for enhanced potassium-ion batteries by mitigating phase transformation
Source: Royal Society of Chemistry journal article supplement (doi:10.1039/d4ta03853c), 2024-01-01
Supplement: d4ta03853c1.pdf [file d4ta03853c1.pdf]

## Supporting Information

# Layer-structured $P3\text{-K}_{0.5}\text{Mn}_{0.95}\text{W}_{0.05}\text{O}_2$ for Enhanced Potassium-ion Batteries by Mitigating Phase Transformation

Xuan-Wen Gao,<sup>a,b</sup> Lu-Kang Zhao,<sup>a</sup> Qi Li,<sup>a</sup> Rui Yang,<sup>a</sup> Zhao-meng Liu,<sup>a,b</sup> Wen-Bin Luo<sup>a\*</sup>

<sup>a</sup>Institute for Energy Electrochemistry and Urban Mines Metallurgy, School of Metallurgy, Northeastern University, Shen yang, Liaoning 110819, China.

<sup>b</sup>Key Laboratory of Advanced Energy Materials Chemistry (Ministry of Education), College of Chemistry, Nankai University, Tianjin 300071, China

Corresponding Authors

E-mail: luowenbin@smm.neu.edu.cn

## KEYWORDS

Potassium ion battery; layer-structured oxide; cathode materials; structural stability; phase transformation

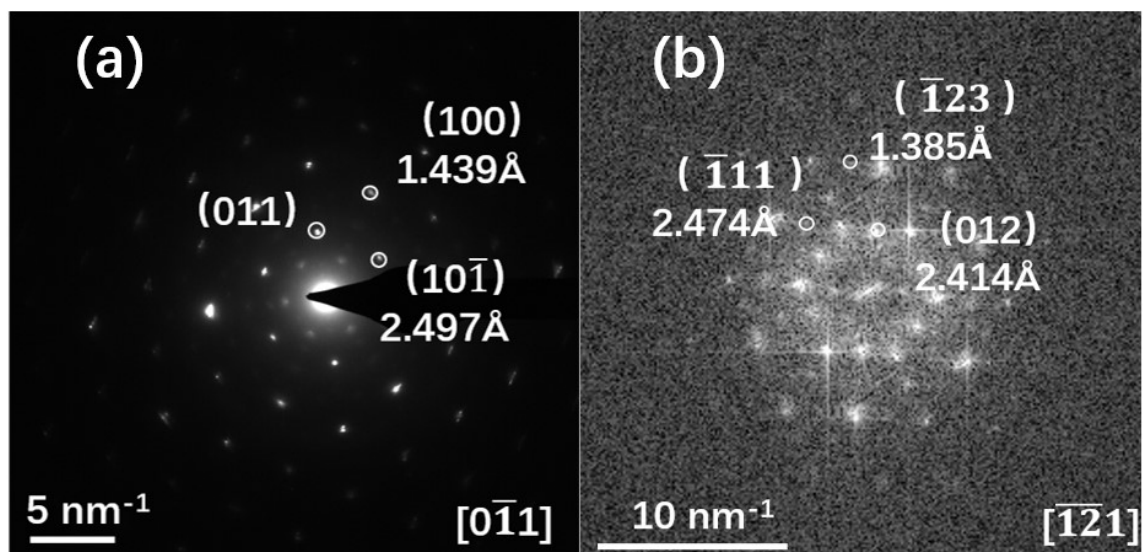

**Figure S1.** (a, b) Fast Fourier transform (FFT) patterns of KMWO

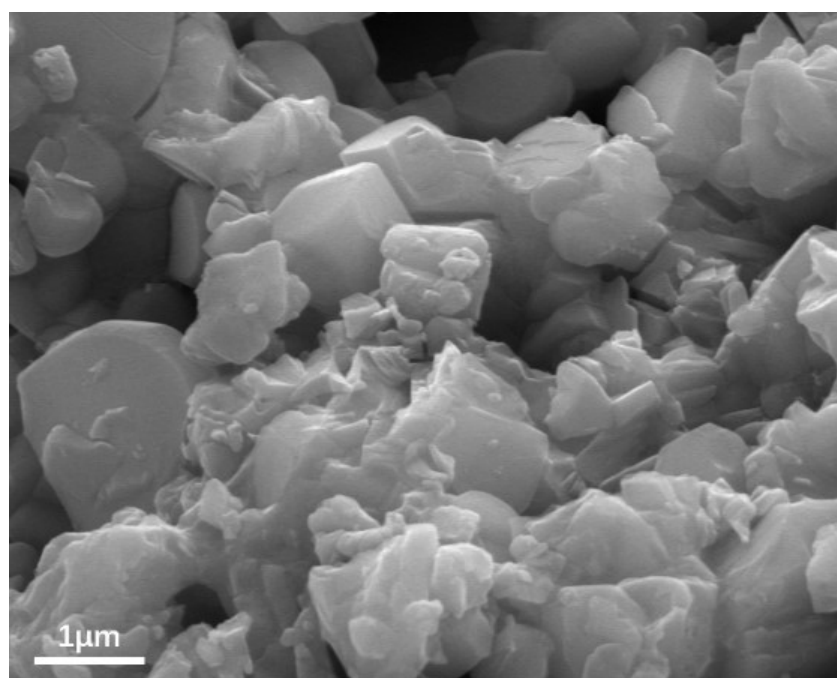

**Figure S2.** SEM image of KMO

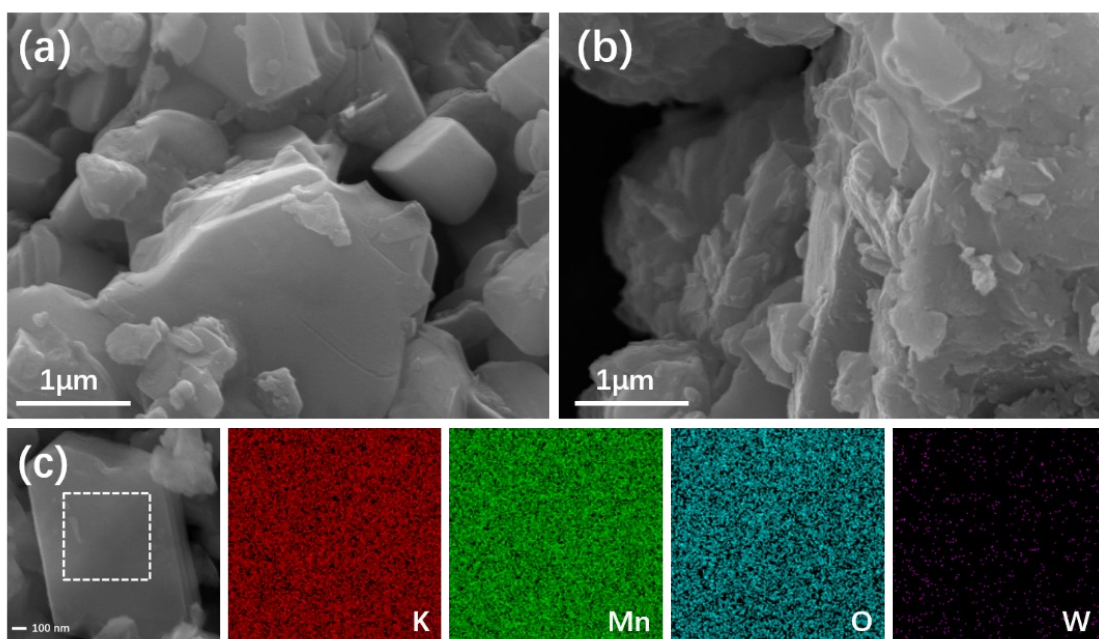

**Figure S3.** a, b) SEM image of KMWO at different magnification. c) EDS elemental mapping of KMWO

**Table S1.** Structural parameters of KMO obtained by Rietveld refinement of Figure 1.

| Atom | x        | y | z       | B     | Occ.  |
|------|----------|---|---------|-------|-------|
| O1   | 0.31369  | 0 | 0.0449  | 1.486 | 1.034 |
| K1   | -3.65726 | 0 | 1.56993 | 0.235 | 0.108 |
| Mn1  | 0        | 0 | 0       | 0.803 | 1.308 |
| O2   | -0.26641 | 0 | 0.53281 | 1.486 | 0.962 |

**Table S2.** Structural parameters of KMWO obtained by Rietveld refinement of Figure 1.

| Atom | x        | y | z       | B      | Occ.     |
|------|----------|---|---------|--------|----------|
| O1   | 0.35981  | 0 | 0.12086 | 0.514  | 1.152    |
| K1   | -2.90676 | 0 | 1.58737 | 29.924 | 0.1872   |
| Mn1  | 0        | 0 | 0       | 6.747  | 1.372856 |
| O2   | -0.30242 | 0 | 0.50785 | 0.514  | 0.798    |
| W1   | 0        | 0 | 0       | 6.747  | 0.05     |

**Table S3.** Results of fitting the variable temperature electrochemical impedance spectra to the magnitude of the activation energy.

| Sample | Temperature (K) | R <sub>ct</sub> ( $\Omega$ ) | E <sub>a</sub> (KJ mol <sup>-1</sup> ) |
|--------|-----------------|------------------------------|----------------------------------------|
| KMO    | 303.15          | 5603                         | 96.77                                  |
|        | 308.15          | 2875                         |                                        |
|        | 313.15          | 2248                         |                                        |
|        | 318.15          | 1379                         |                                        |
|        | 323.15          | 922                          |                                        |
| KMWO   | 303.15          | 5039                         | 73.43                                  |
|        | 308.15          | 2310                         |                                        |
|        | 313.15          | 1746                         |                                        |
|        | 318.15          | 926                          |                                        |
|        | 323.15          | 276                          |                                        |
